# Supplementary material for: Socio-economic status influences access to second-line disease modifying treatment in Relapsing Remitting Multiple Sclerosis patients
Source: PubMed Central journal article supplement (PMC5794112; doi:10.1371/journal.pone.0191646), 2018-02-01
Supplement: pone.0191646.s001.pdf [file pone.0191646.s001.pdf]

**S1 Table : Association between SES and access to a second-line DMT for RRMS patients with a potential indication of second-line DMT after a 5-years delay between first and second line DMT.**

| <b>Factors</b>                                | <b>HR [IC 95%]</b> | <b>p-value</b> |
|-----------------------------------------------|--------------------|----------------|
| <b>Gender</b>                                 |                    | 0.6163         |
| Males                                         | 1.00 (Reference)   |                |
| Females                                       | 0.91 [0.62-1.33]   |                |
| <b>Age at disease onset</b>                   |                    | 0.369          |
| [15-25 years]                                 | 1.00 (Reference)   |                |
| [26-35 years]                                 | 0.74 [0.49-1.11]   |                |
| [36-45 years]                                 | 0.78 [0.48-1.28]   |                |
| >45 years                                     | 0.54 [0.21-1.39]   |                |
| <b>County of residence at diagnosis</b>       |                    | 0.1472         |
| Manche                                        | 1.00 (Reference)   |                |
| Calvados                                      | 0.72 [0.48-1.07]   |                |
| Orne                                          | 0.61 [0.35-1.06]   |                |
| <b>Period of diagnosis</b>                    |                    | 0.3818         |
| 1982-2000                                     | 1.00 (Reference)   |                |
| 2001-2011                                     | 1.31 [0.72-2.37]   |                |
| <b>Year of disease onset</b>                  | 1.16 [1.1-1.23]    | <0.001         |
| <b>EDI<sup>(a)</sup> (quintiles combined)</b> |                    |                |
| Q2-Q5                                         | 1.00 (Reference)   |                |
| Q1                                            | 2.13 [1.07-4.22]   | 0.0391         |

<sup>(a)</sup> Multivariate Cox model for studying EDI effect was performed using EDI as time varying covariate that allows taking into consideration the interaction between EDI and time. (tvc function of STATA ® software)

DMT: Disease Modifying Treatment

RRMS: Relapsing Remitting Multiple Sclerosis

HR: Hazard Ratio

CI: Confidence Interval

EDI: European Deprivation Index
